# Supplementary material for: Successful Primary Stenting in a Patient with Acute STEMI and SevereThrombocytopenia (&lt; 6,000/uL) Due to ITP after IVIG Therapy. (A Case report with Review)
Source: Research Square preprint supplement (doi:10.21203/rs.3.rs-8011301/v1), 2026-01-08
Supplement: Supplementary file 1 [file 1f5be5a863c0545b2b047fea.docx]

# Completed COREQ

Domain 1: Research Team and Reflexivity

1. Interviewer/Facilitator: Dr. Dhyaa Sulaiman, MD (primary author, cardiology resident) collected all data for this case.

2. Credentials: Dr. Dhyaa Sulaiman (MD, Cardiology Resident); Supervisor: Dr. Sedqi Moqbil (MD, FEBIC), Egyptian Board of intervention cardiology, NHI

3. Occupation: At the time of the study, Dr. Sulaiman was a cardiology resident responsible for clinical evaluation and data collection.

4. Gender: Male.

5. Experience and Training: Experienced in acute cardiac care, STEMI management, and observational data collection for case reports.

Domain 2: Study Design

6. Methodological Orientation: Observational clinical case report with narrative qualitative synthesis supported by descriptive, comparative, causal, and clinical interpretive data analyses.

7. Sampling: A single patient selected based on the clinical presentation of acute STEMI with severe thrombocytopenia.

8. Method of Approach: Patient was evaluated clinically, in the emergency department, coronary care unit, catheterization laboratory, and during subsequent outpatient follow‑up.

9. Sample Size: One patient.

10. Non‑participation: Not applicable.

Domain 3: Setting

11. Setting of Data Collection: Cardiology Department, Catheterization Laboratory, and Outpatient Clinic.

12. Presence of Non‑participants: Only clinical staff directly involved in patient care were present.

13. Description of Sample: Adult patient with acute STEMI and severe thrombocytopenia (<6,000/uL) due to ITP following IVIG therapy.

Domain 4: Data Collection

14. Interview Guide: Not applicable; data collected from clinical notes, investigations, ECGs, angiography records, and direct patient assessment.

15. Repeat Interviews: Not applicable; data were collected continuously during hospitalization and follow‑up.

16. Audio/Visual Recording: No audio recordings; only clinical diagnostic images (ECG, angiogram) were used.

17. Field Notes: Clinical observations and procedural notes were documented in the medical record.

18. Duration: Data were collected during the acute hospital course and subsequent outpatient follow‑up.

19. Data Saturation: Not applicable for a single‑patient case report.

20. Transcripts Returned: Not applicable.

Domain 5: Data Analysis

21. Number of Data Coders: One primary coder (Dr. Dhyaa Sulaiman). All analyses reviewed and approved by supervisor (Dr. Sedqi).

22. Coding Tree Description: Not applicable to case reports; data were organized chronologically and thematically.

23. Derivation of Themes: Themes derived from clinical progression, diagnostic findings, and treatment outcomes.

24. Software: No software used; analysis was conducted manually.

25. Participant Checking: Not applicable.

Domain 6: Reporting

26. Quotations Presented: Not applicable.

27. Data and Findings Consistent: Yes, all data directly support the interpretation and final conclusions.

28. Clarity of Major Themes: Clinical themes are clearly outlined: presentation, diagnosis, intervention, outcome.

29. Clarity of Minor Themes: Additional details (e.g., platelet dynamics, IVIG effect, bleeding risk) are described where relevant.

30. Reporting of Outcome: Patient showed improvement → stabilization → discharge → continued outpatient follow‑up.

Ethical Considerations

31. Informed Consent: The patient is alive. Written informed consent for publication was obtained from the ethical committee and verbal consent was obtained from the patient’s family.

32. Confidentiality: All patient identifiers were removed. Only one ECG image initially had the name visible, which was subsequently covered before submission.
